# Supplementary material for: Chirality-dependent hydrogen bond direction in jet-cooled (S)-1,2,3,4-tetrahydro-3-isoquinoline methanol (THIQM): IR-ion dip vibrational spectroscopy of the neutral and the ion
Source: Royal Society of Chemistry journal article supplement (doi:10.1039/b822871j), 2009-01-01
Supplement: b822871j.pdf [file b822871j.pdf]

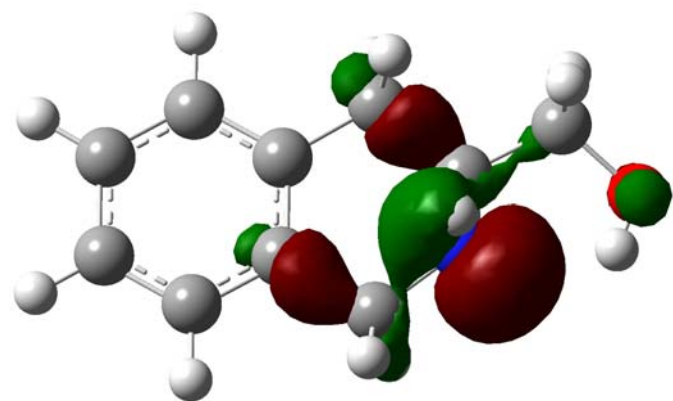

Conformer I

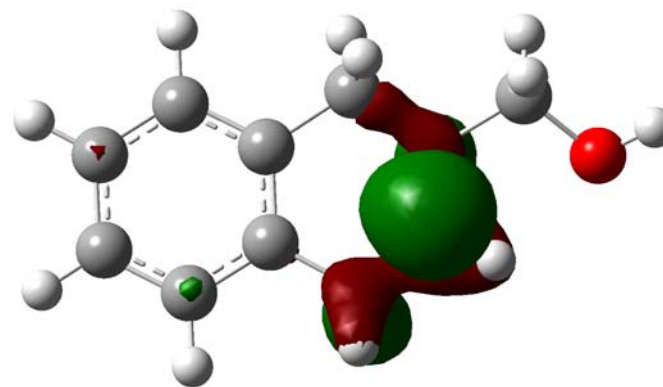

Conformer II

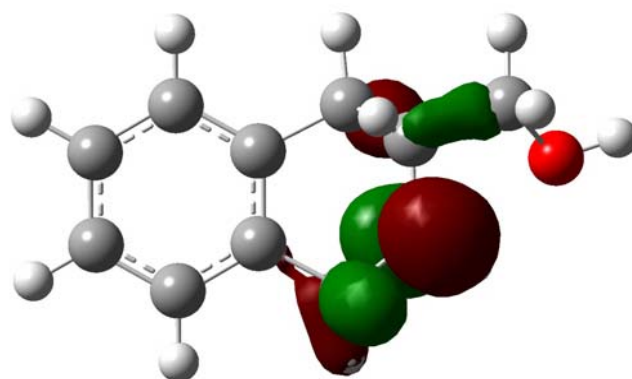

Cation

HOMO Orbitals of neutral Conformers I and II and the ion of THIQM, as obtained at the MP2 6-31++G(d, p) level of theory.
